# Supplementary material
Source: PubMed Central journal article supplement (PMC3370845)
Supplement: supp_194.12.3058_TableS1.pdf [file supp_194.12.3058_TableS1.pdf]

Supplemental Table 1. **Oligonucleotides used in this study.**

| Plasmid <sup>a</sup> | Description <sup>b</sup> | Oligo name | Sequence (5'-3') <sup>c</sup>           |
|----------------------|--------------------------|------------|-----------------------------------------|
| pPH158               | <i>mrpC</i> for          | oPH485     | <u>catggatccc</u> acggtttcaaccgcccctc   |
|                      | <i>mrpC</i> rev          | oPH486     | ggctc <u>gagctactt</u> ctccttgccggcgatc |
| pPH165               | $\Delta mazF$ A          | oPH518     | <u>cggaattca</u> agagcgtctcgggggtgc     |
|                      | $\Delta mazF$ B          | oPH519     | <b>ctggaagc</b> gaccgcggttgattcgctcg    |
|                      | $\Delta mazF$ C          | oPH520     | <b>aaccg</b> ggtcgcttcagcaggtgtcg       |
|                      | $\Delta mazF$ D          | oPH521     | <u>gcggatccc</u> gcagggtcaagacgagc      |
| pPH165               | $\Delta mrpC$ A          | oPH487     | <u>gcggaattc</u> cactccgccaccacac       |
|                      | $\Delta mrpC$ B          | oPH488     | <b>gatacggc</b> cggaaccgatggggccgag     |
|                      | $\Delta mrpC$ C          | oPH489     | <b>atcggttc</b> ggccgtatcctctgcgtg      |
|                      | $\Delta mrpC$ D          | oPH490     | <u>gcgggatcc</u> atgagccgctcgcggagc     |

<sup>a</sup> Primers used for each plasmid construction are listed.

<sup>b</sup> Primers labeled as A, B, C, or D represent the primers used for the two-step PCR fragment fusion process [described in (1)]. Primers are otherwise labeled as forward (for) or reverse (rev).

<sup>c</sup> Bolded sequences indicate the overlapping regions used to combine PCR fragments. Underlined sequences indicate restriction sites used for cloning.

1. Lee, B., Schramm, A., Jagadeesan, S., and Higgs, P. I. (2010) *Methods Enzymol* **471**, 253-278
